# Supplementary material for: Transcriptome Response of Metallicolous and a Non-Metallicolous Ecotypes of Noccaea goesingensis to Nickel Excess
Source: Plants (Basel). 2020 Jul 28;9(8):951. doi: 10.3390/plants9080951 (PMC7464472; doi:10.3390/plants9080951)
Supplement: Supplementary file 1 [file plants-09-00951-s001.xlsx]

## Sheet: Nickel_Positive
Sample Name	Unaligned Reads (Percentage)	Aligned 1 time (Percentage)	Aligned > 1 (Percentage)	Total Alignment
14_TF.fastq	46337 (30.77%)	98680 (65.54%)	5552 (3.69%)	0.6923
11_TR.fastq	1162676 (32.39%)	2309755 (64.35%)	117080 (3.26%)	0.6761
10_TR.fastq	1518433 (34.05%)	2766509 (62.04%	174172 (3.91%)	0.6595
1_TF.fastq	2903201 (32.43%)	5577969 (62.31%)	471407 (5.27%)	0.6757
2_TF.fastq	2425849 (33.43%)	4494581 (61.94%)	336244 (4.63%)	0.6657

## Sheet: Nickel_Negative
Sample Name	Unaligned Reads (Percetage)	Aligned 1 time (Percentage)	Aligned > 1 (Percentage)	Total Alignment
7_TR.fastq	1523486 (35.19%)	2635420 (60.88%)	169846 (3.92%)	0.6481
6_TR.fastq	2686469 (35.46%)	4588590 (60.56%)	301684 (3.98%)	0.6454
8_TR.fastq	1638421 (33.04%)	3106289 (62.63%)	214749 (4.33%)	0.6696
10_TR.fastq	2295764 (33.40%)	4386556 (63.83%)	190212 (2.77%)	0.666
11_TF.fastq	1903068 (32.91%)	3657089 (63.24%)	222909 (3.85%)	0.6709
12_TF.fastq	1707729 (29.04%)	3830607 (65.15%)	341392 (5.81%)	0.7096
13_TF.fastq	1849148 (33.46%)	3526903 (63.82%)	149895 (2.71%)	0.6654
